# Supplementary material
Source: PubMed Central journal article supplement (PMC4670240)
Supplement: NIHMS728568-supplement-5.pdf [file NIHMS728568-supplement-5.pdf]

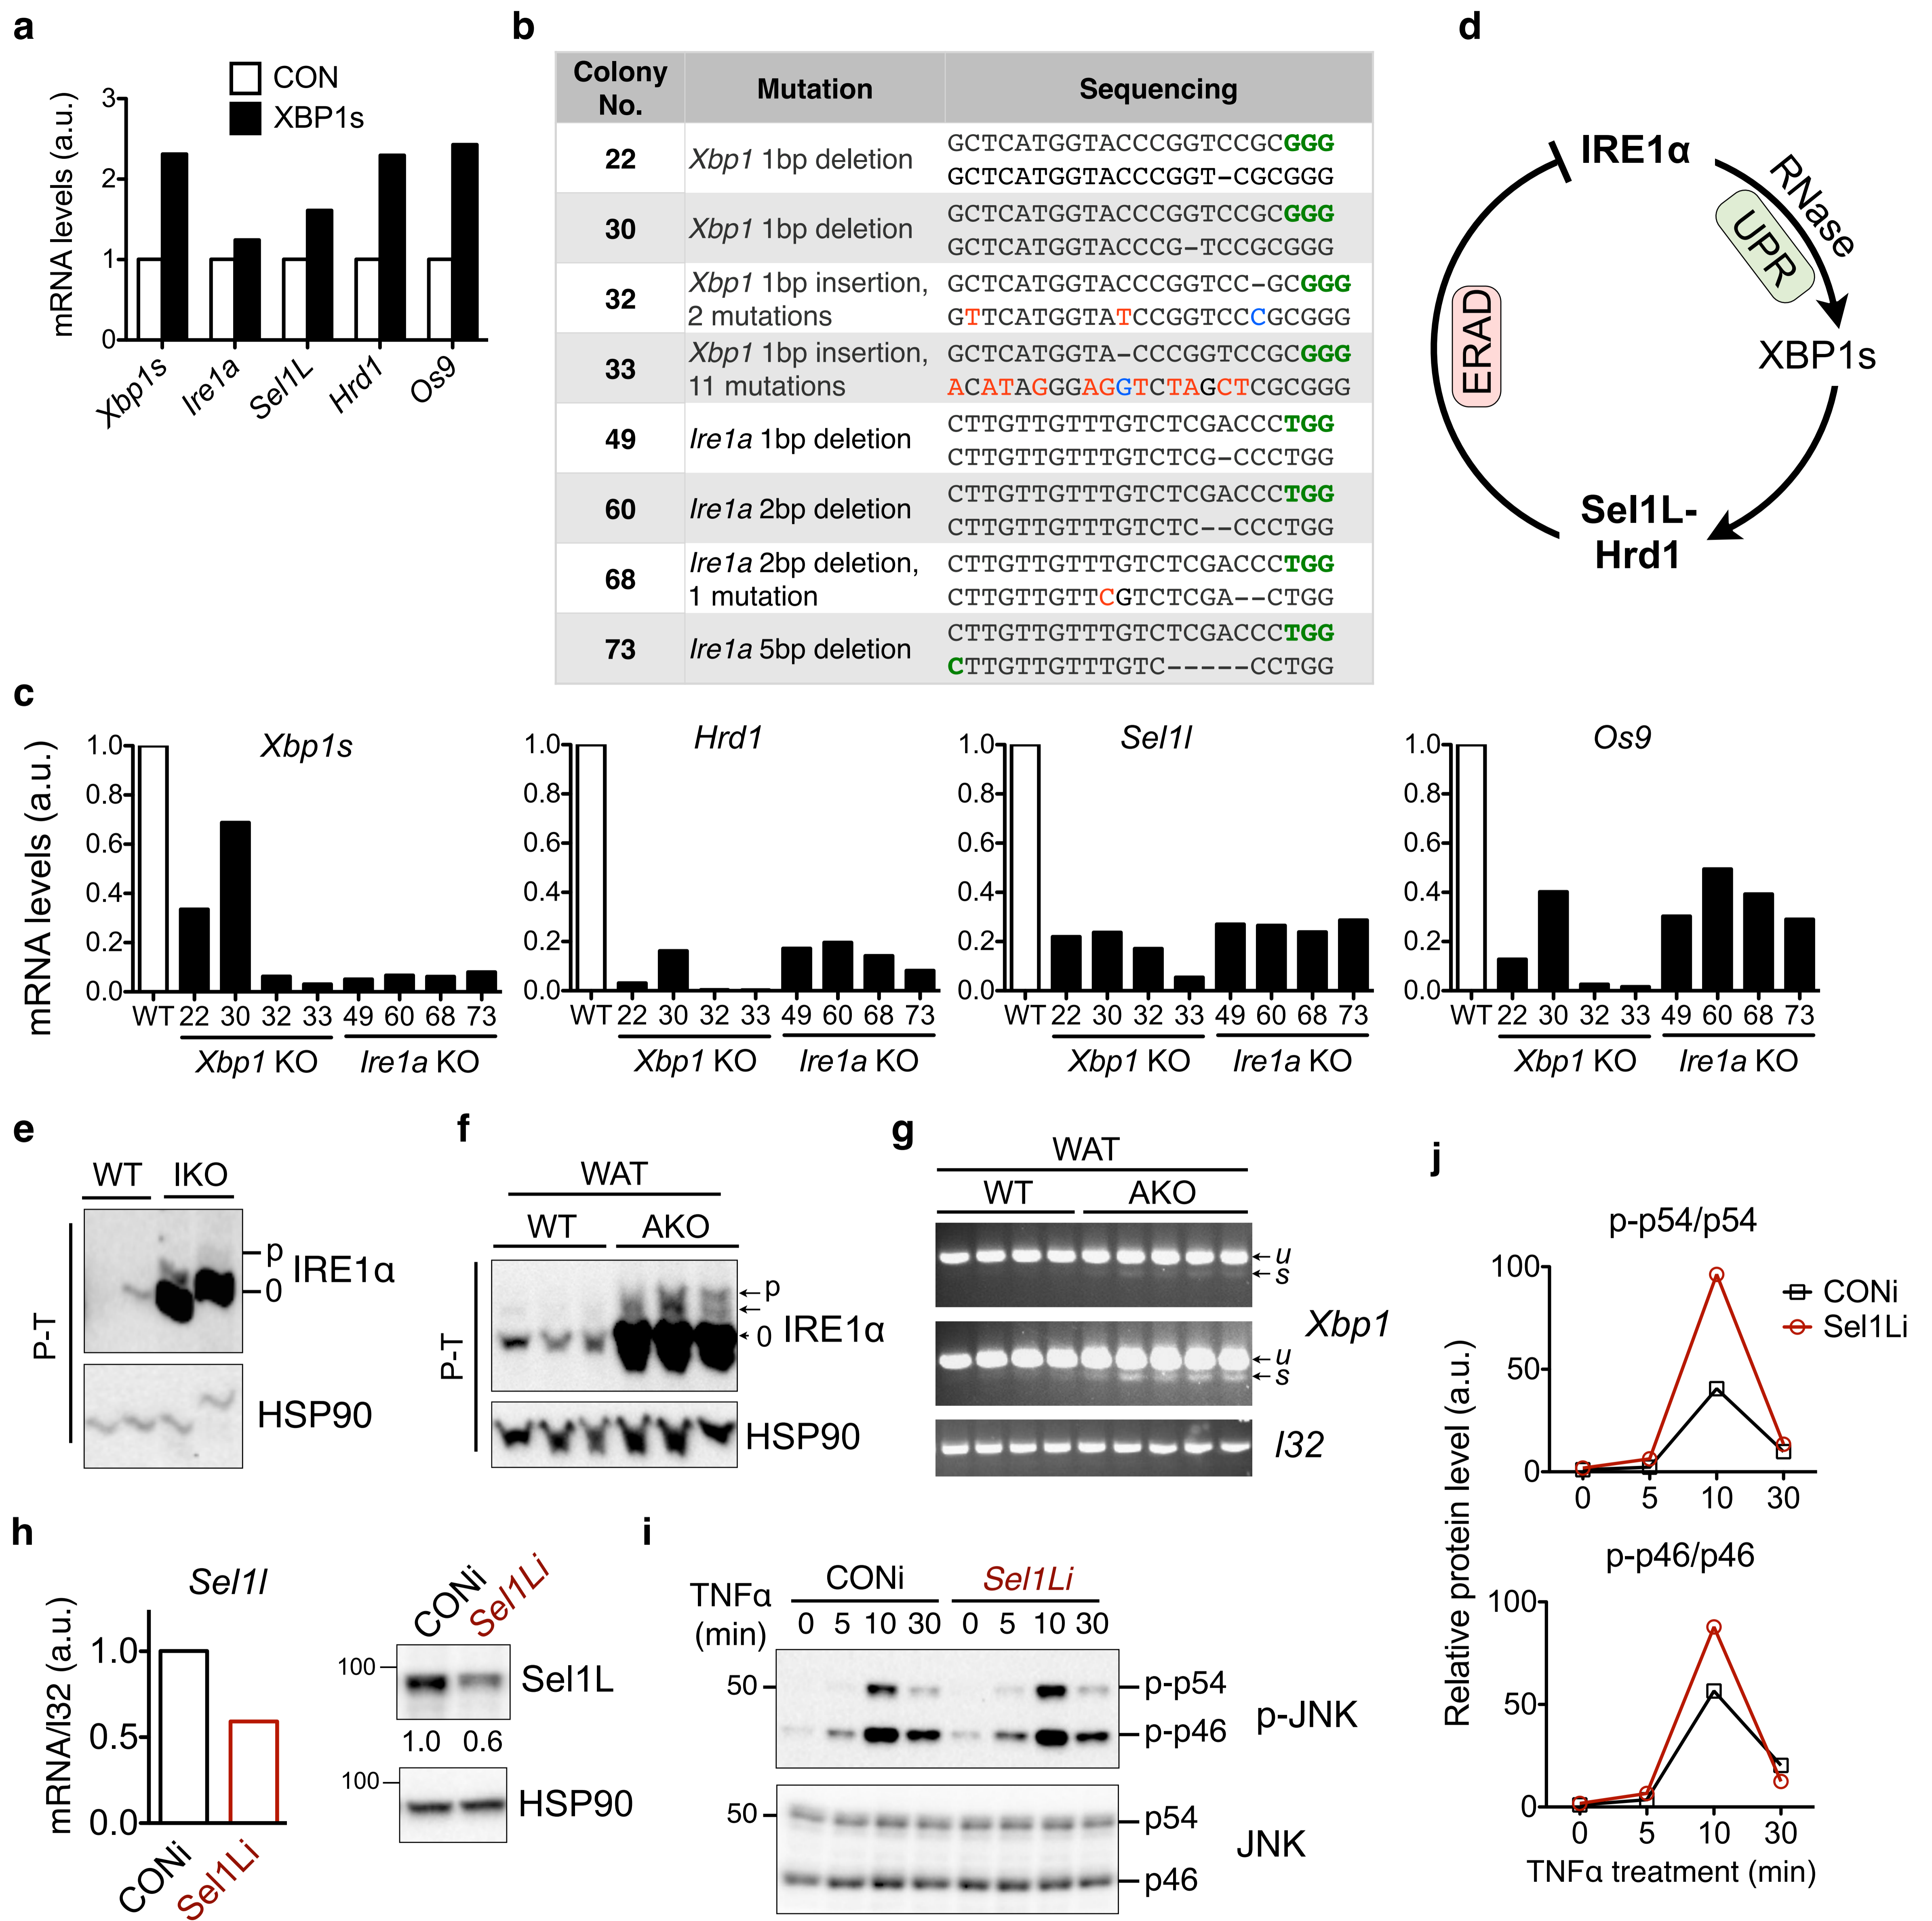

**Supplementary Figure 4. Regulatory circuitry of ERAD and IRE1α and elevated inflammation in Sel1L-deficient cells.**
