# Supplementary material
Source: PubMed Central journal article supplement (PMC4670240)
Supplement: NIHMS728568-supplement-6.pdf [file NIHMS728568-supplement-6.pdf]

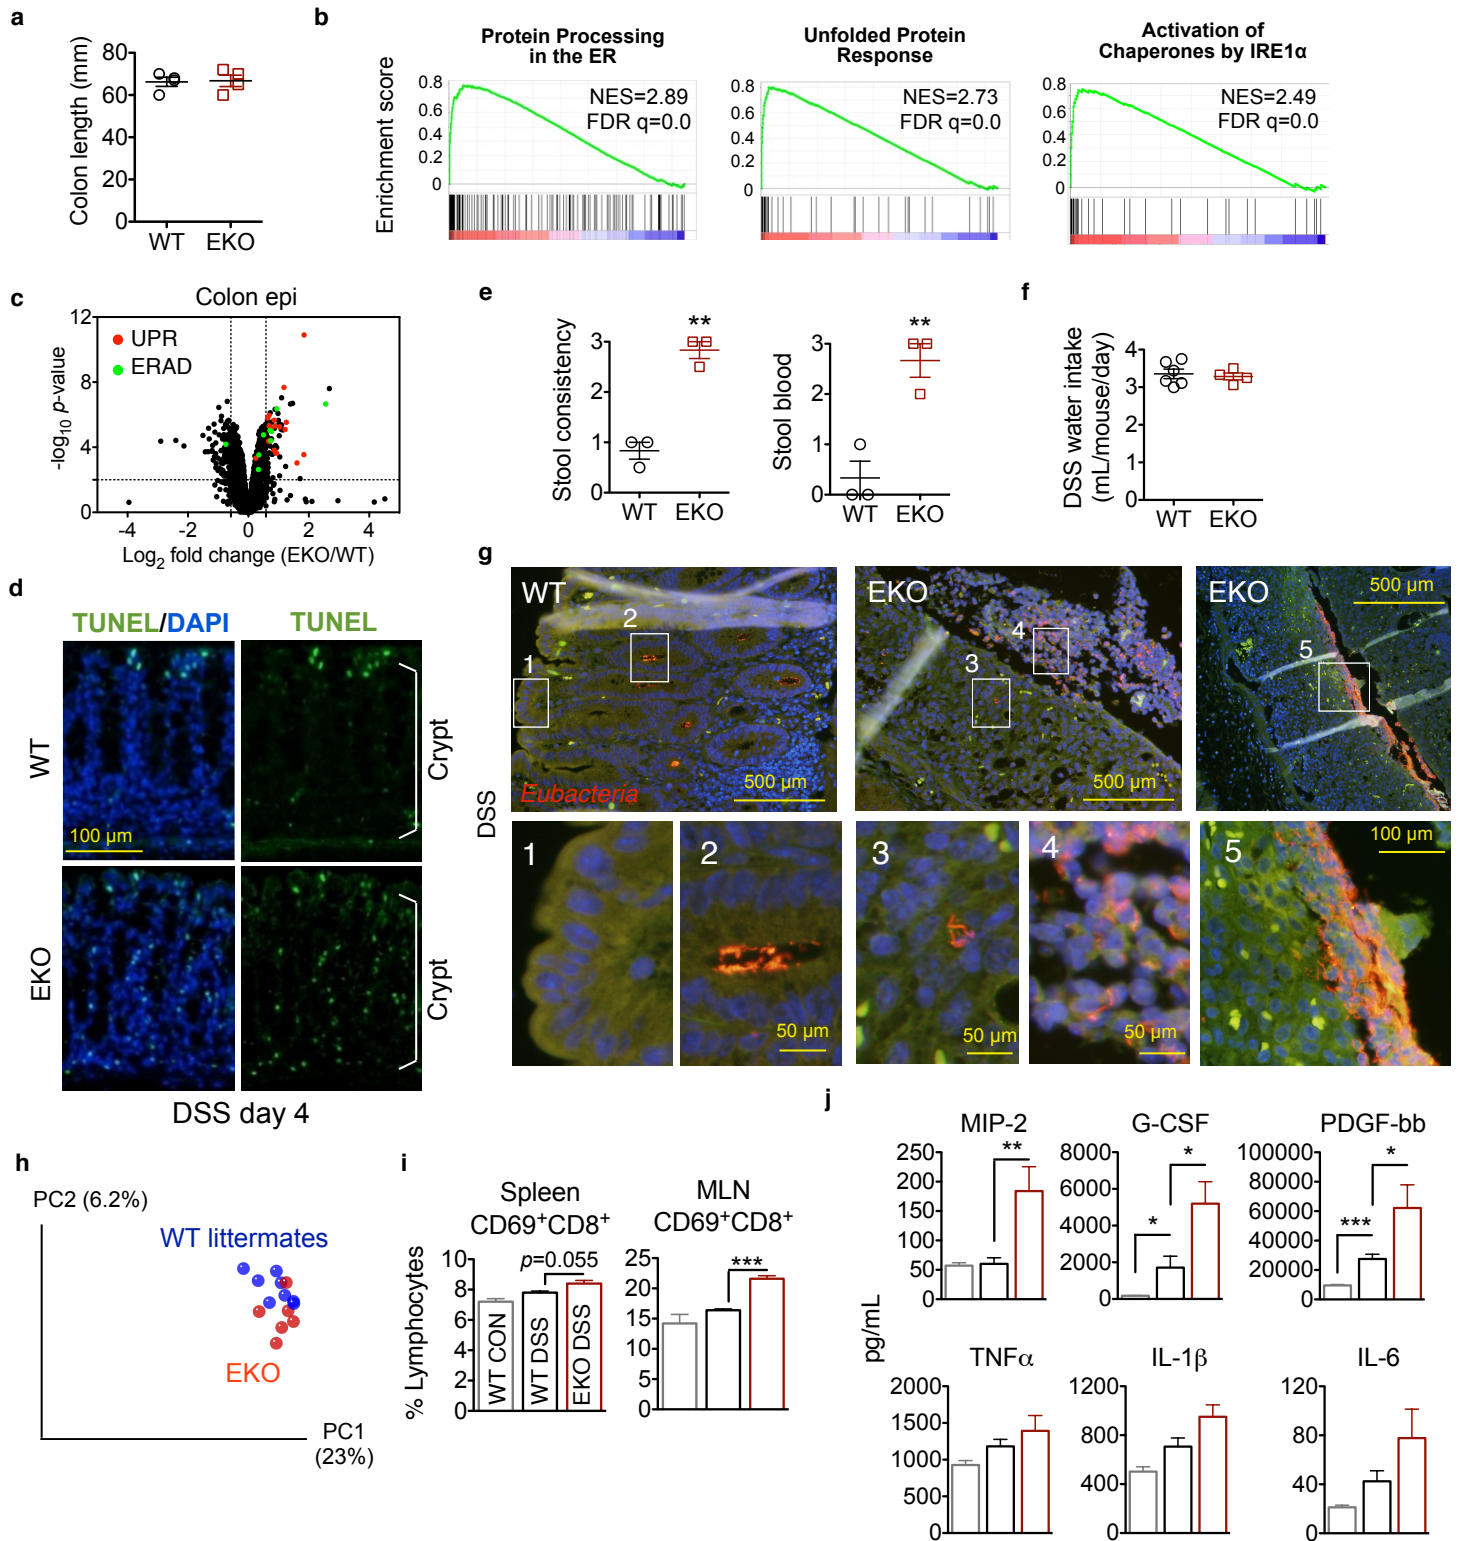

**Supplementary Figure 5. The status of UPR and IRE1 $\alpha$  signaling in colonic epithelium and sensitivity to experimental colitis of *Sei1L $\Delta$ IEC* (EKO) mice.**
