# Supplementary material
Source: PubMed Central journal article supplement (PMC4670240)
Supplement: NIHMS728568-supplement-7.pdf [file NIHMS728568-supplement-7.pdf]

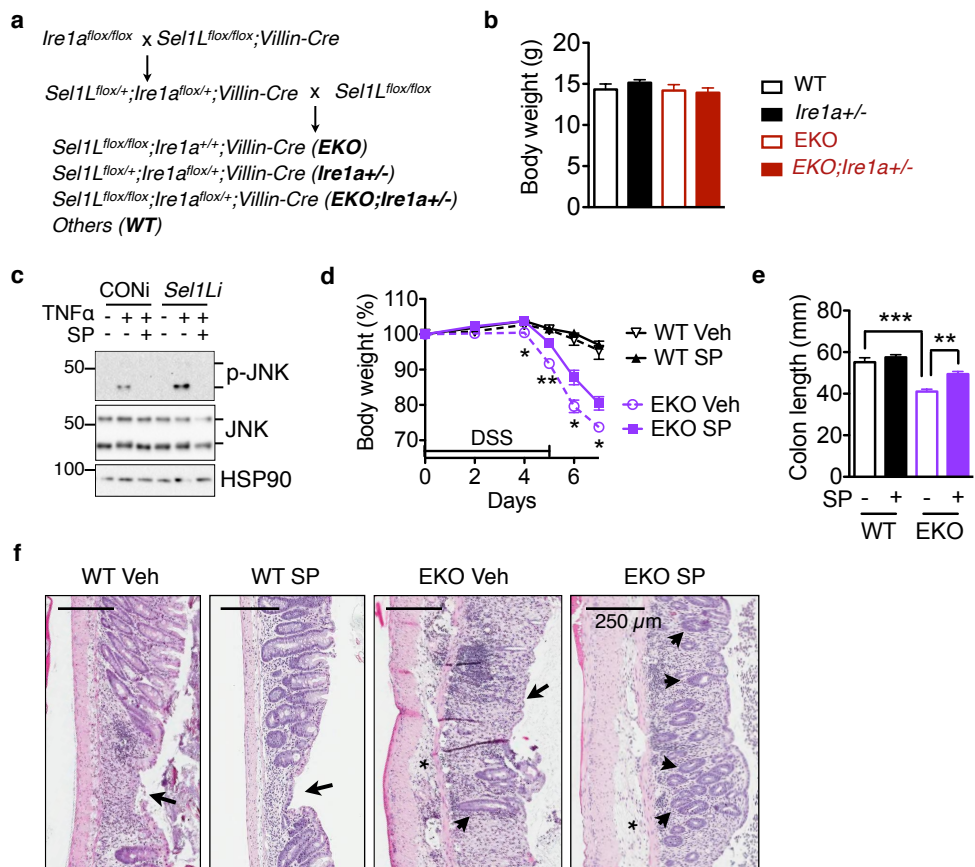

**Supplementary Figure 6. Dissecting the role of IRE1 $\alpha$  heterozygosity and inflammation in the pathogenesis of experimental colitis in *Sel1L<sup>ΔIEC</sup>* (EKO) mice.**
