# Supplementary material
Source: PubMed Central journal article supplement (PMC4670240)
Supplement: NIHMS728568-supplement-8.pdf [file NIHMS728568-supplement-8.pdf]

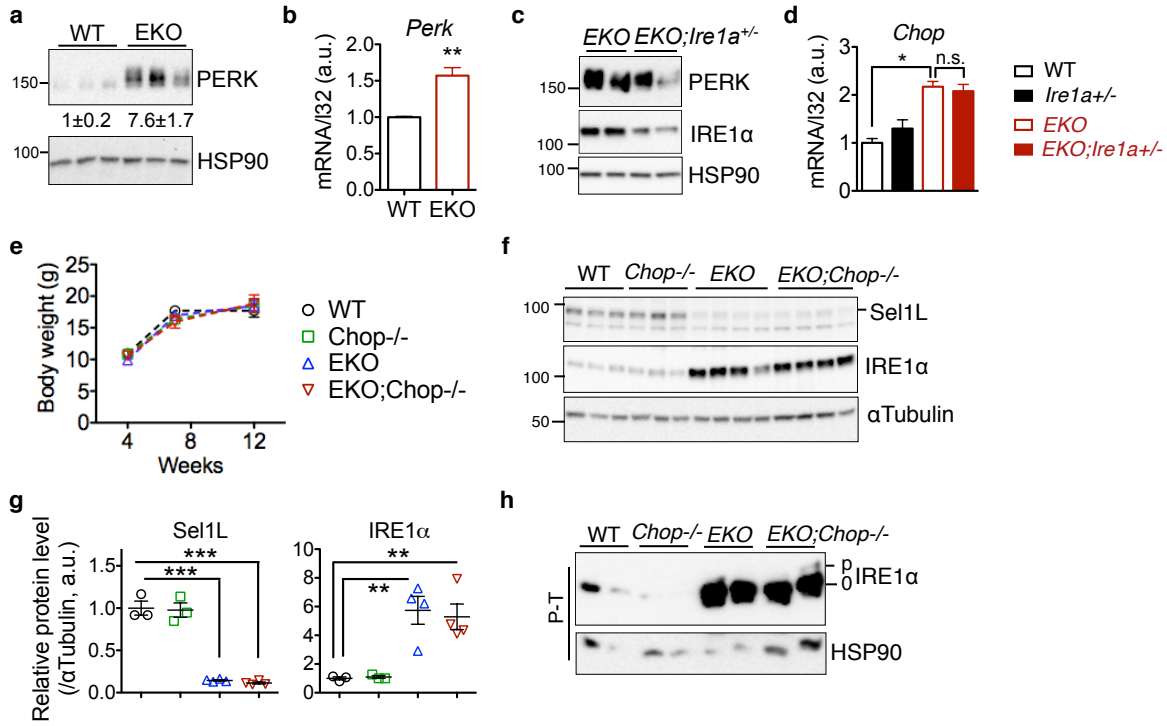

**Supplementary Figure 7. CHOP is dispensable for the disease pathogenesis of *Sel1L<sup>ΔIEC</sup>* (EKO) mice.**
