# Supplementary material
Source: PubMed Central journal article supplement (PMC4670240)
Supplement: NIHMS728568-supplement-9.pdf [file NIHMS728568-supplement-9.pdf]

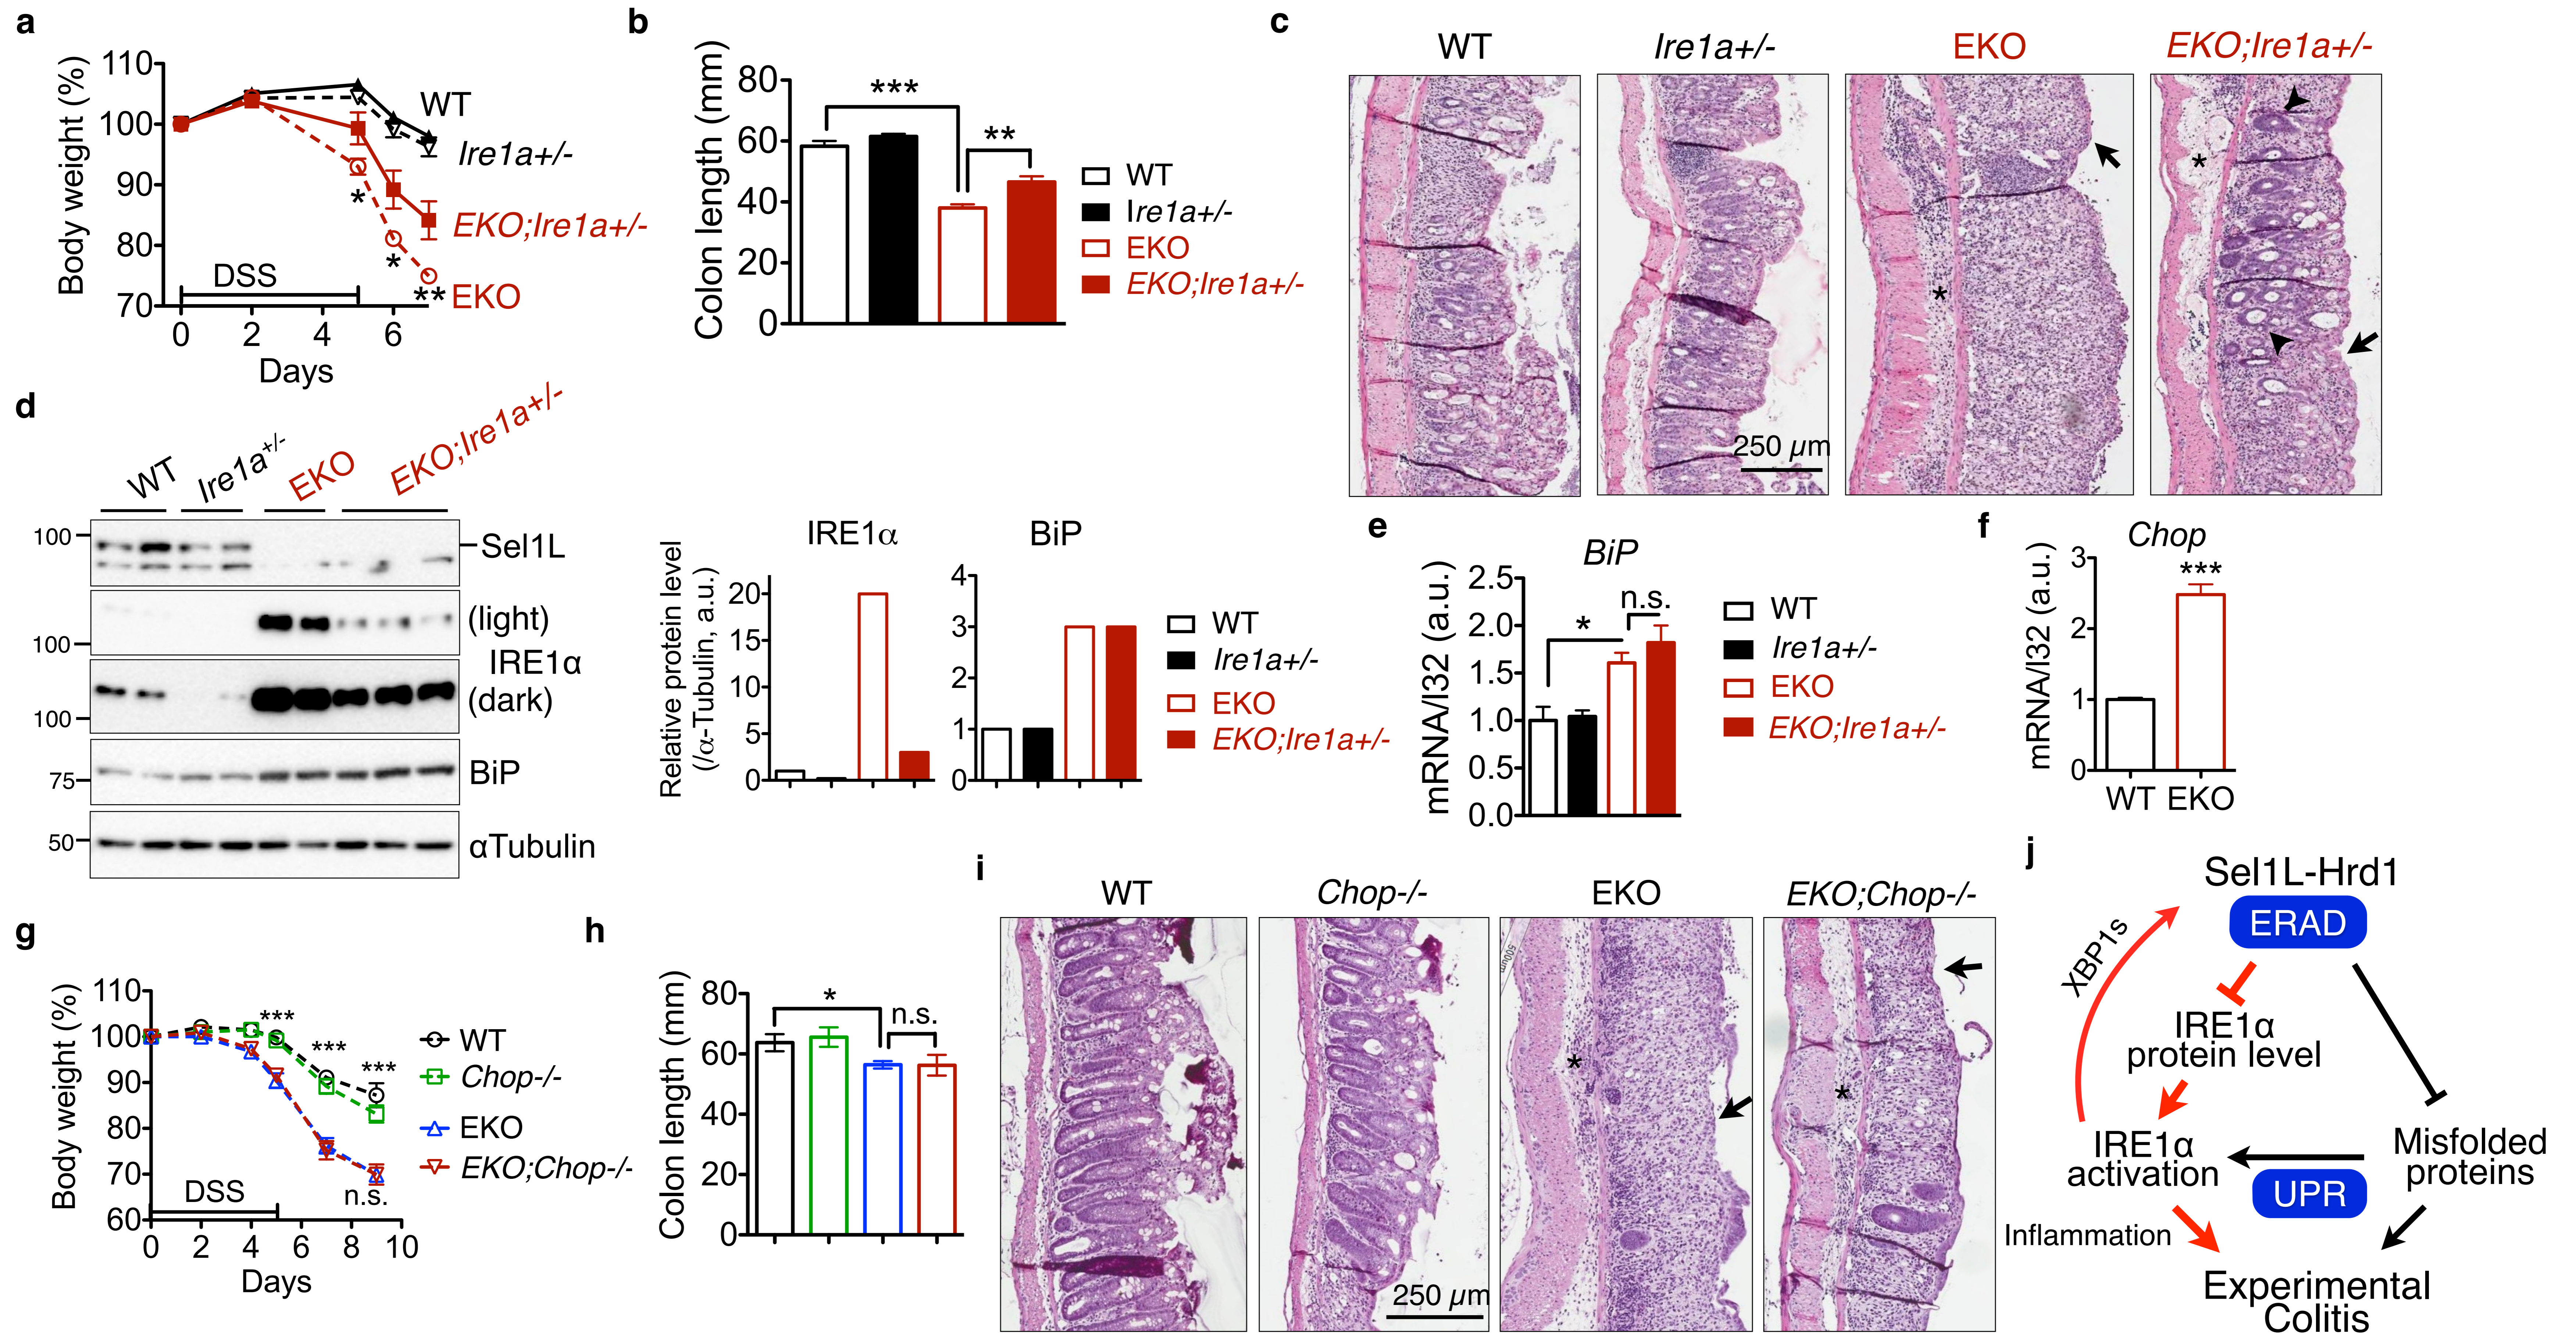

**Figure 8. IRE1 $\alpha$  protein accumulation is critical for the pathogenesis of colitis in *Sel1L* <sup>$\Delta$ IEC</sup> (EKO) mice.**
