# Supplementary material
Source: PubMed Central journal article supplement (PMC4670240)

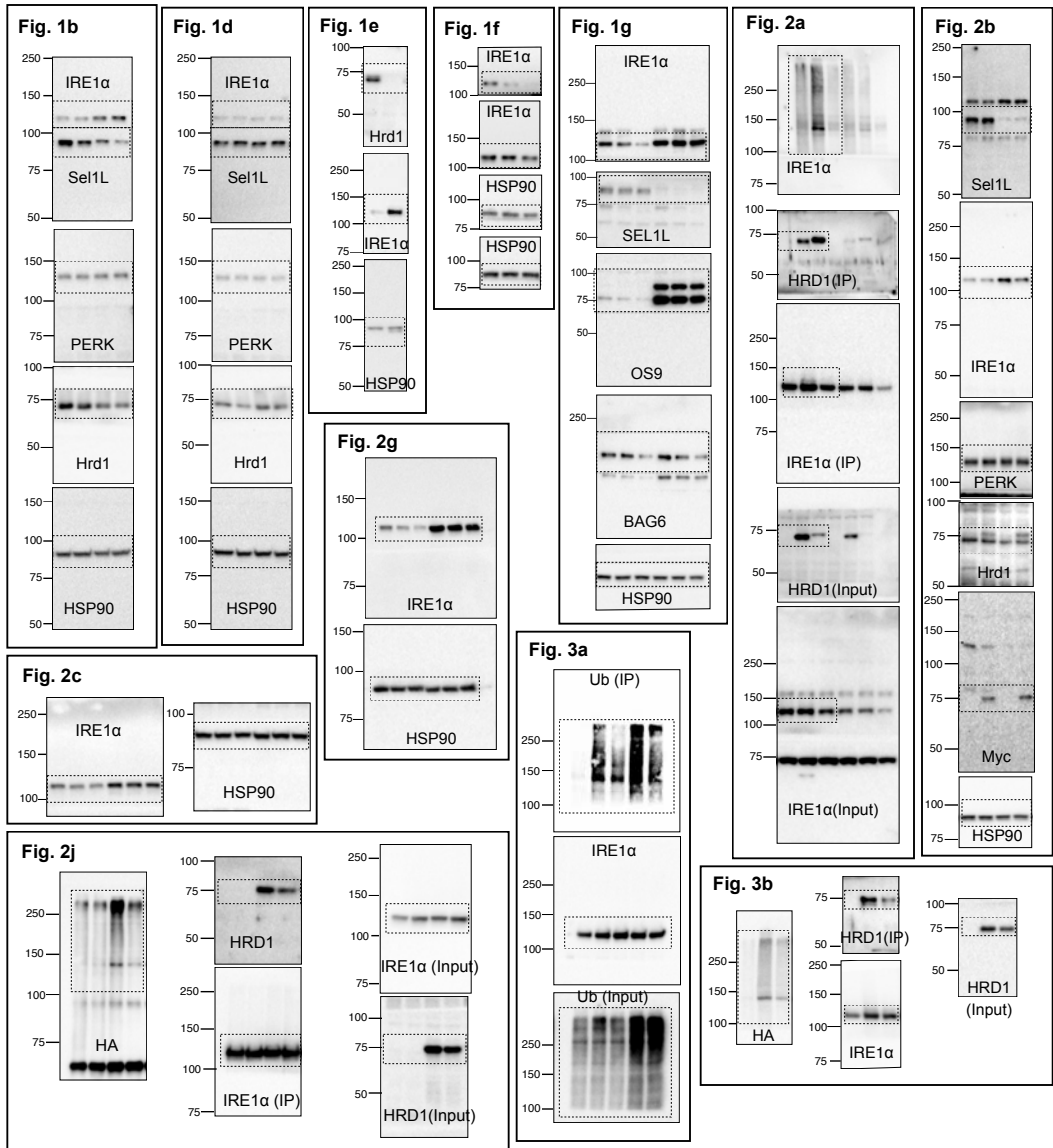

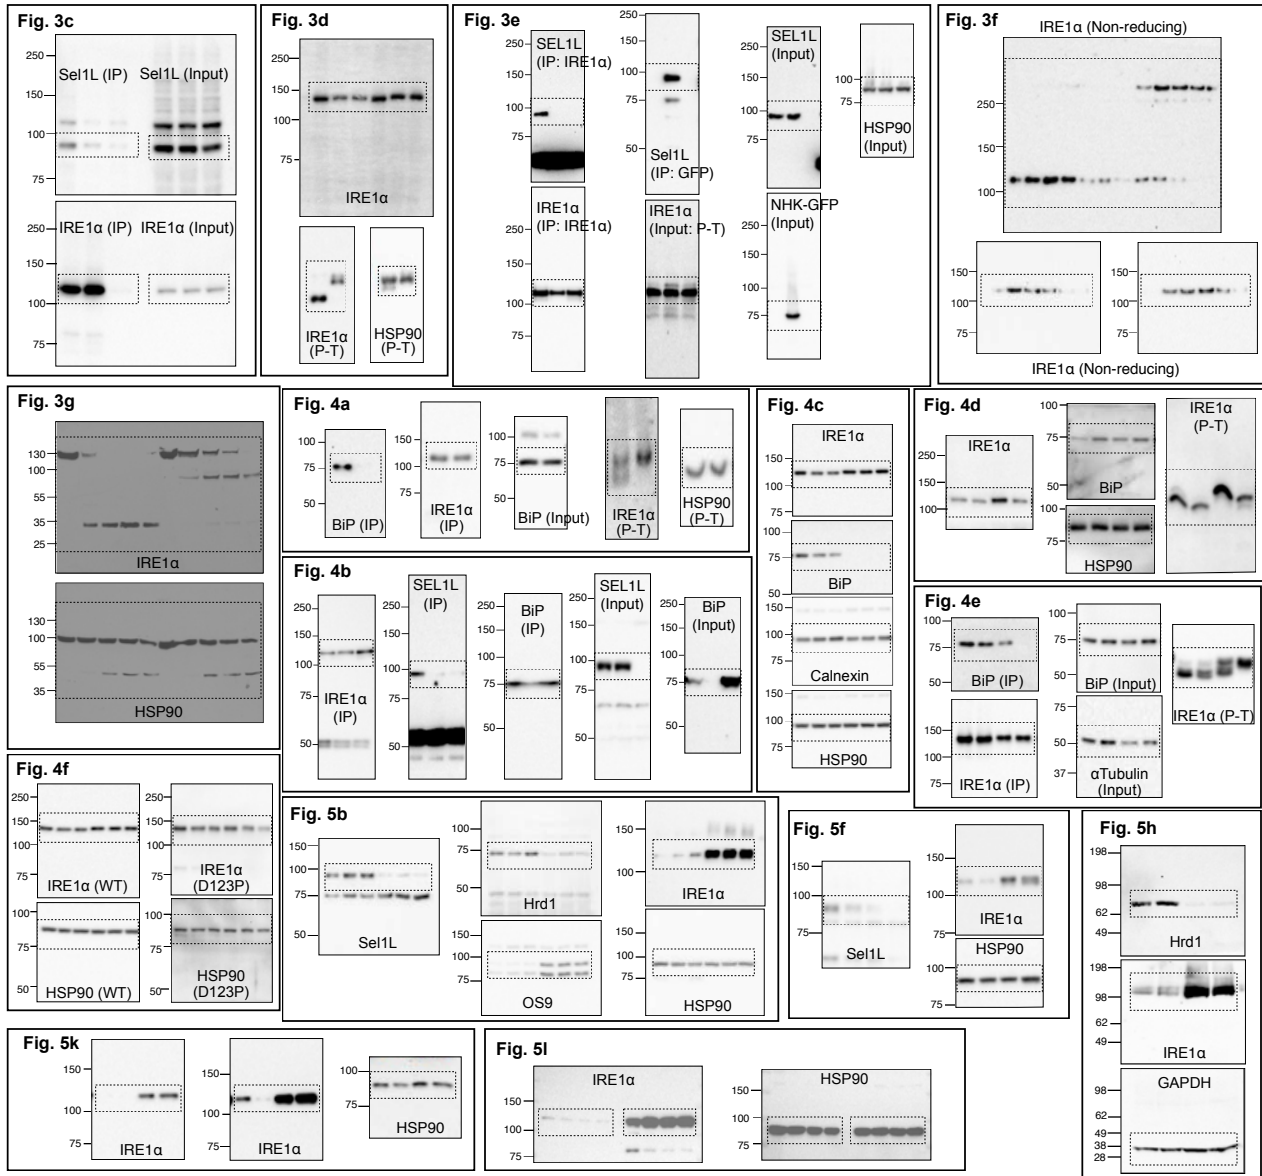

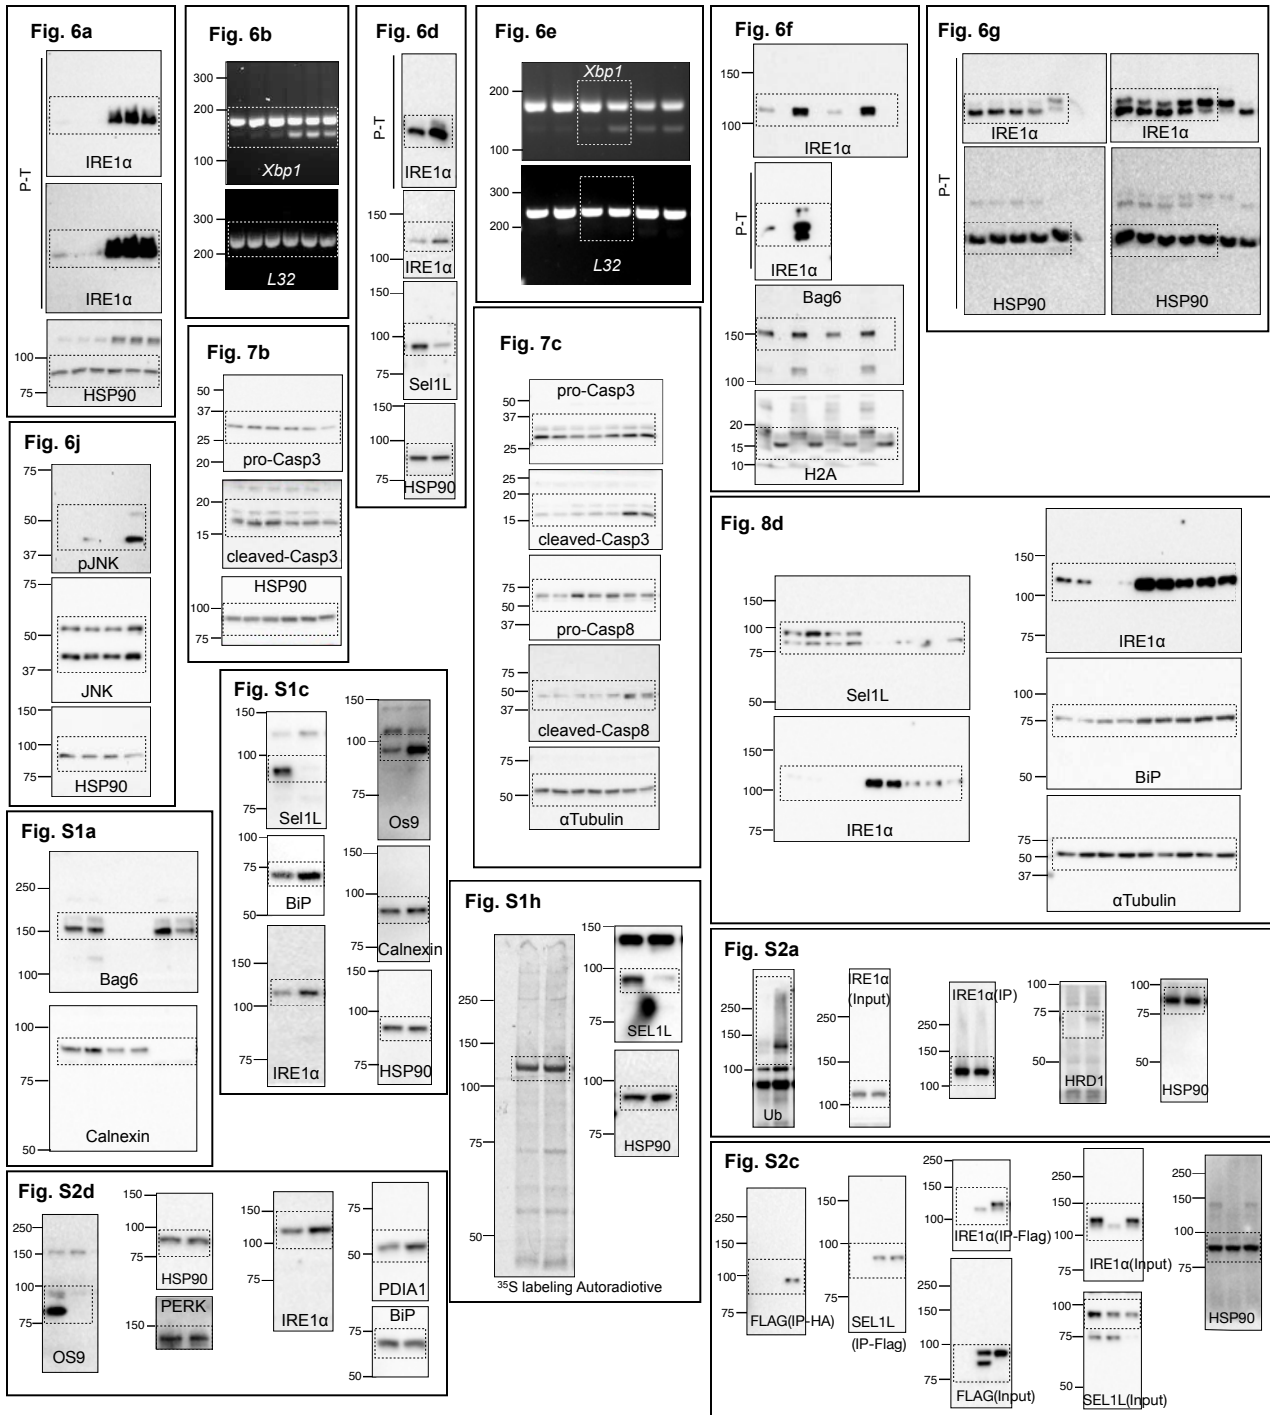

Supplement: NIHMS728568-supplement-10.pdf [file NIHMS728568-supplement-10.pdf]

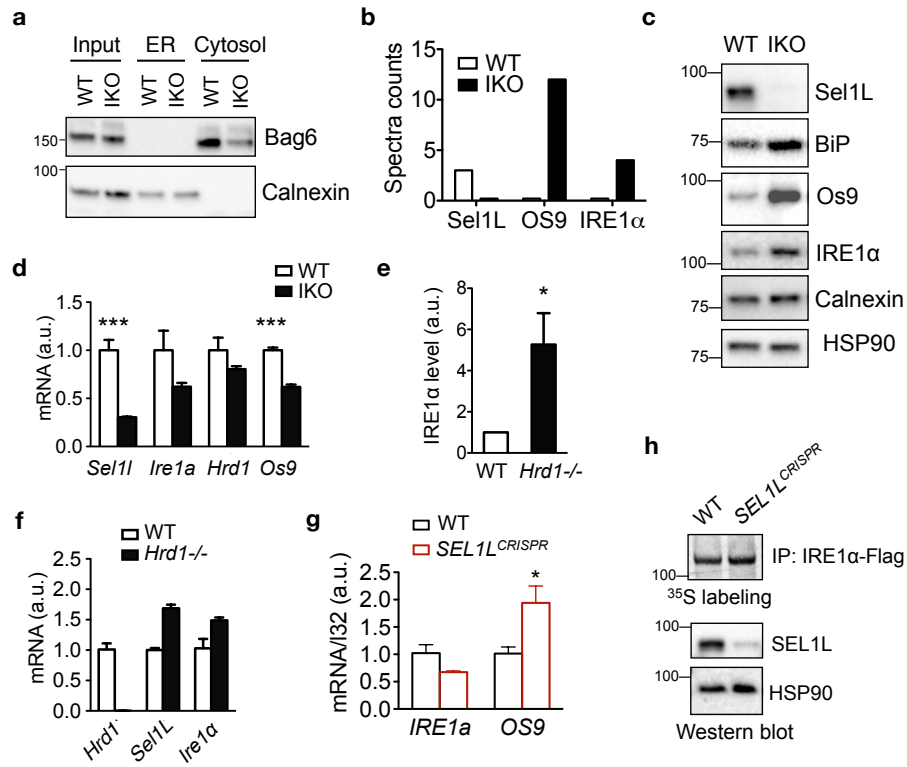

**Supplementary Figure 1. Identification of IRE1α as an ERAD substrate in vitro.**

Supplement: NIHMS728568-supplement-2.pdf [file NIHMS728568-supplement-2.pdf]

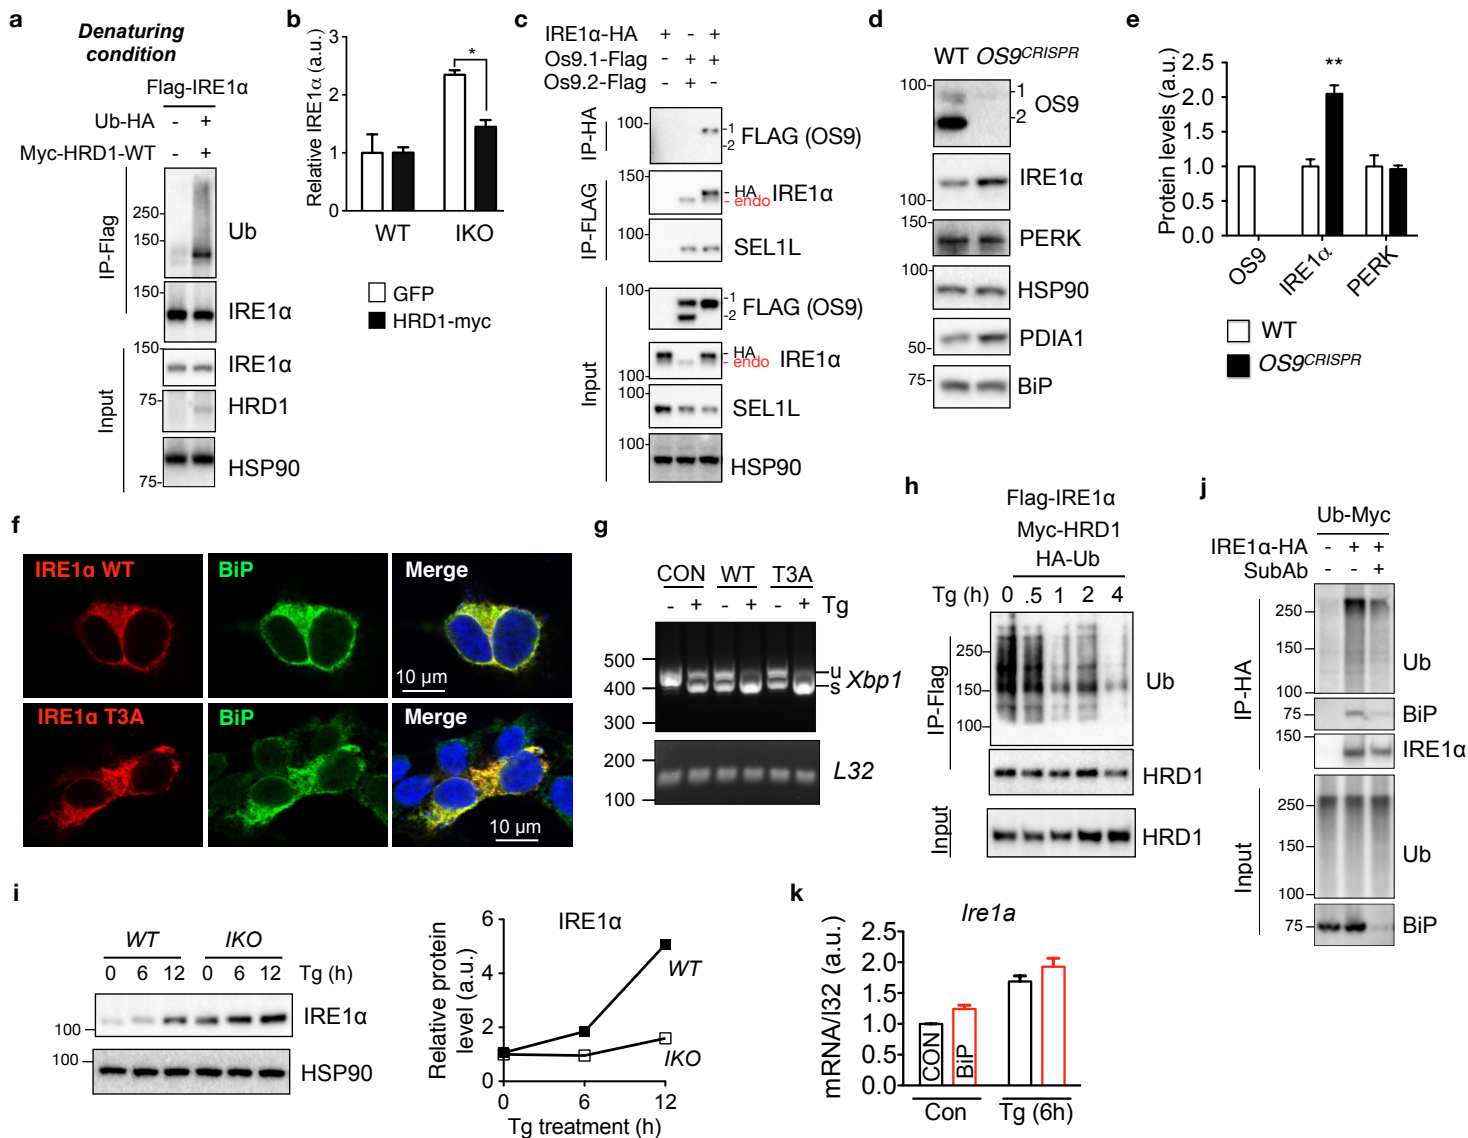

Supplementary Figure 2. Molecular mechanism underlying IRE1 $\alpha$  degradation.

Supplement: NIHMS728568-supplement-3.pdf [file NIHMS728568-supplement-3.pdf]

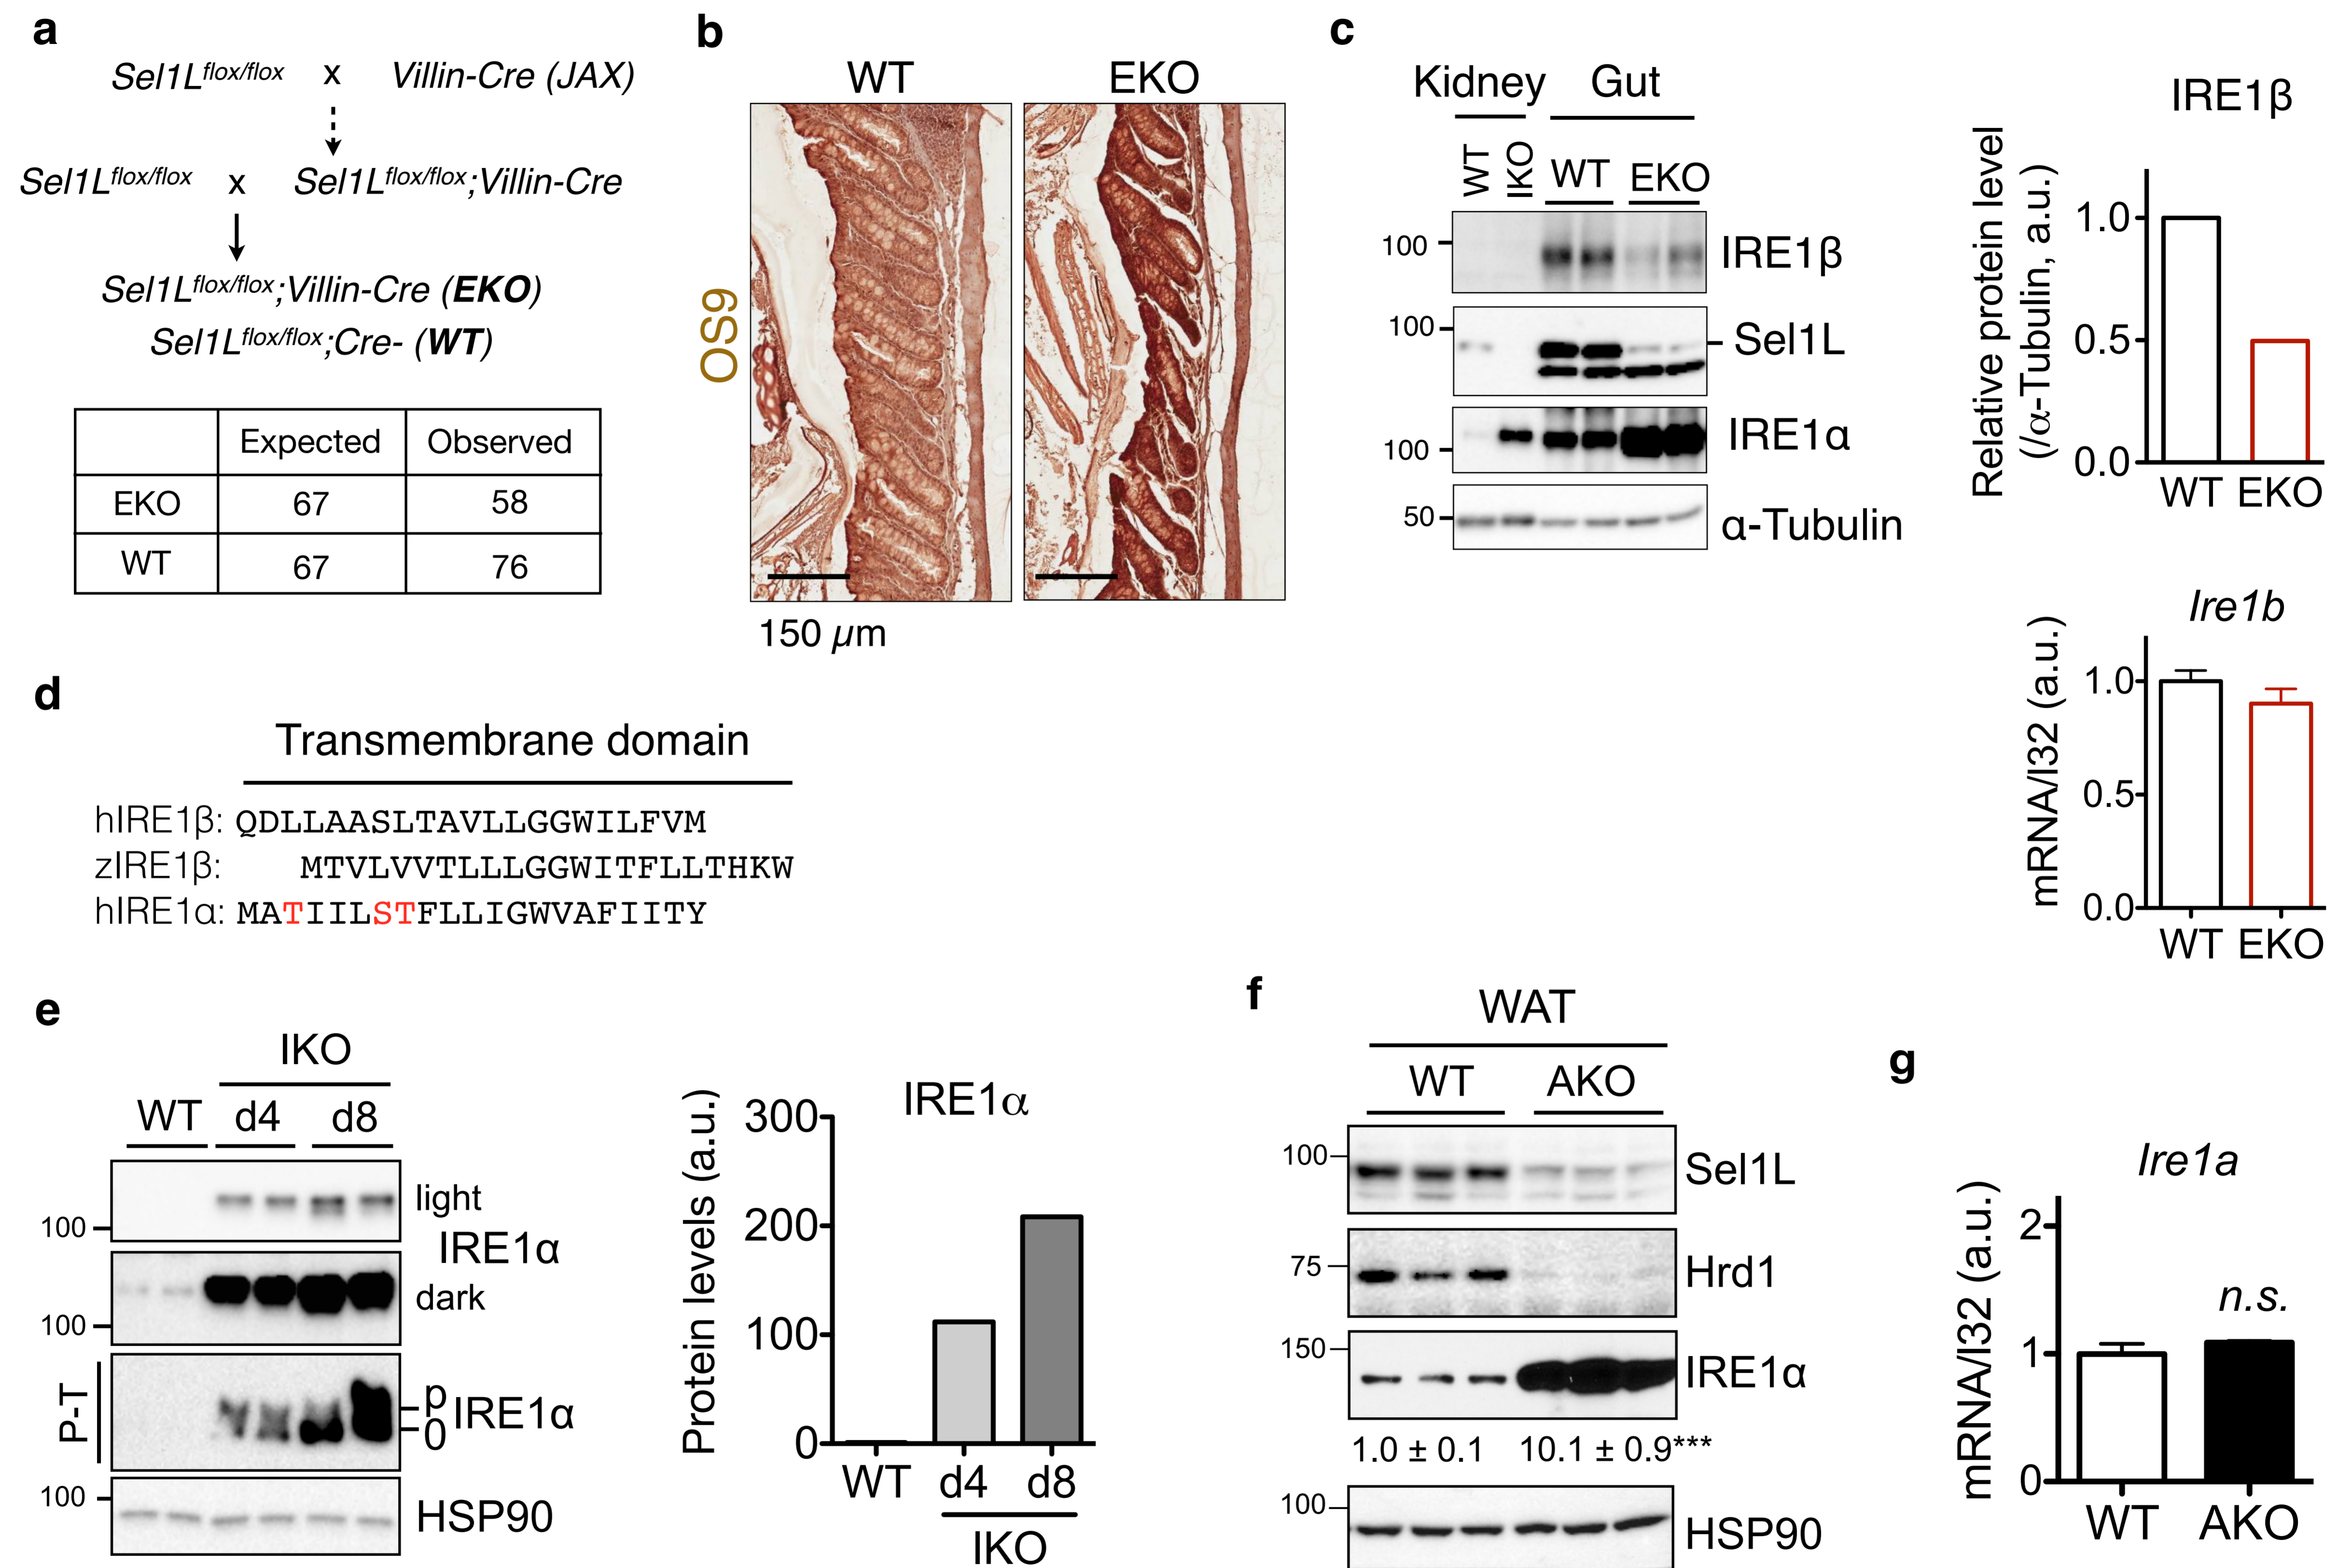

Supplementary Figure 3. IRE1 $\alpha$  is degraded by the Sel1L-Hrd1 ERAD in various tissues.

Supplement: NIHMS728568-supplement-4.pdf [file NIHMS728568-supplement-4.pdf]
